# Supplementary material
Source: Springer Nature journal article supplement (https://www.springermedizin.de/resource/supplementary/12879_2011_1667_MOESM1_ESM.pdf/9443044)
Supplement: MOESM1 [file 9443044]

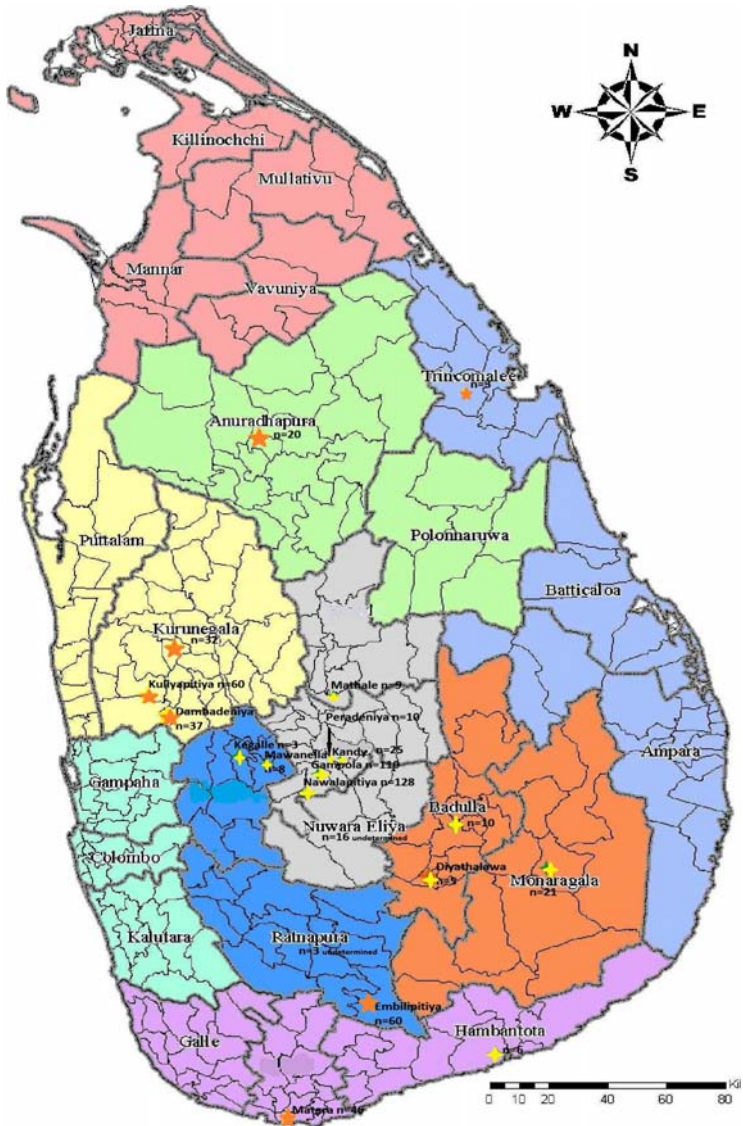

Yellow stars – Areas with spotted fever predominance

Orange stars – Areas with scrub typhus predominance
